# Supplementary material for: Comparative Effectiveness of Bimekizumab and Secukinumab in Patients with Psoriatic Arthritis at 52 Weeks Using a Matching-Adjusted Indirect Comparison
Source: Springer Nature journal article supplement (doi:10.1007/s40744-024-00652-7), 2024-03-06
Supplement: MOESM1 [file 26825948]

# **Comparative Effectiveness of Bimekizumab and Secukinumab in Patients with Psoriatic Arthritis at 52-Weeks Using a Matching-Adjusted Indirect Comparison**

## **Supplementary Materials**

Philip J. Mease<sup>1</sup>, Richard B. Warren<sup>2</sup>, Peter Nash<sup>3</sup>, Jean-Marie Grouin<sup>4</sup>, Nikos Lyris<sup>5</sup>, Damon Willems<sup>6</sup>, Vanessa Taieb<sup>7</sup>, Jason Eells<sup>5</sup>, Iain B. McInnes<sup>8</sup>

*<sup>1</sup>Swedish Medical Center/Providence St. Joseph Health, and University of Washington, Seattle, WA, USA; <sup>2</sup>Dermatology Centre, Northern Care Alliance NHS Foundation Trust, The University of Manchester, Manchester Academic Health Science Centre, NIHR Manchester Biomedical Research Centre, Manchester, UK; <sup>3</sup>School of Medicine, Griffith University School of Medicine, Brisbane, Queensland, Australia; <sup>4</sup>University of Rouen, Rouen, France; <sup>5</sup>UCB Pharma, Slough, UK; <sup>6</sup>UCB Pharma, Brussels, Belgium; <sup>7</sup>UCB Pharma, Colombes, France; <sup>8</sup>University of Glasgow, College of Medical Veterinary and Life Sciences, Glasgow, UK*

**Correspondence to:** Iain B. McInnes ([Iain.McInnes@glasgow.ac.uk](mailto:Iain.McInnes@glasgow.ac.uk))  
College of Medical, Veterinary & Life Sciences  
Wolfson Medical School Building  
University of Glasgow  
University Avenue  
Glasgow G12 8QQ

**Table S1. Base case analysis – Unadjusted and adjusted response rates for bimekizumab (BE OPTIMAL) vs secukinumab (FUTURE 2) at Week 52 (bDMARD-naïve patient subgroup)**

| <b>BKZ 160 mg Q4W</b>                                    | <b>ACR20</b>            | <b>ACR50</b>            | <b>ACR70</b>                       | <b>MDA</b>              |
|----------------------------------------------------------|-------------------------|-------------------------|------------------------------------|-------------------------|
| <b>vs. SEC 150 mg Q4W</b>                                |                         |                         |                                    |                         |
| <b>SEC response rate – % (95% CI) (N=63)</b>             | 79.37<br>(69.17, 89.56) | 49.21<br>(36.62, 61.80) | 23.81<br>(13.08, 34.54)            | 36.52<br>(24.40, 48.65) |
| <b>BKZ unadjusted response rate - % (95% CI) (N=431)</b> | 71.23<br>(66.94, 75.52) | 54.52<br>(49.81, 59.24) | 39.21<br>(34.59, 43.83)            | 54.99<br>(50.28, 59.70) |
| <b>Unadjusted OR (95% CI)</b>                            | 0.64<br>(0.34, 1.23)    | 1.24<br>(0.73, 2.11)    | 2.06<br>(1.12, 3.81)               | 2.12<br>(1.23, 3.68)    |
| <b>BKZ ESS</b>                                           | 236.15                  | 236.15                  | 236.15                             | 236.15                  |
| <b>BKZ adjusted response rate - % (95% CI)</b>           | 71.07<br>(66.01, 76.12) | 53.75<br>(48.19, 59.31) | 42.76<br>(37.24, 48.27)            | 50.49<br>(44.92, 56.06) |
| <b>Adjusted OR (95% CI)</b>                              | 0.64<br>(0.32, 1.26)    | 1.20<br>(0.69, 2.10)    | <b>2.39</b><br><b>(1.26, 4.53)</b> | 1.77<br>(1.00, 3.15)    |
| <b>p-value</b>                                           | 0.193                   | 0.522                   | <b>0.008</b>                       | 0.051                   |
| <b>vs. SEC 300 mg Q4W</b>                                |                         |                         |                                    |                         |
| <b>SEC response rate – % (95% CI) (N=67)</b>             | 68.66<br>(57.34, 79.97) | 52.24<br>(40.06, 64.42) | 26.87<br>(16.05, 37.68)            | 40.03<br>(27.89, 52.17) |
| <b>BKZ unadjusted response rate - % (95% CI) (N=431)</b> | 71.23<br>(66.94, 75.52) | 54.52<br>(49.81, 59.24) | 39.21<br>(34.59, 43.83)            | 54.99<br>(50.28, 59.70) |
| <b>Unadjusted OR (95% CI)</b>                            | 1.13<br>(0.65, 1.98)    | 1.10<br>(0.65, 1.84)    | 1.76<br>(0.99, 3.12)               | 1.83<br>(1.07, 3.12)    |
| <b>BKZ ESS</b>                                           | 236.15                  | 236.15                  | 236.15                             | 236.15                  |
| <b>BKZ adjusted response rate – % (95% CI)</b>           | 71.07<br>(66.01, 76.12) | 53.75<br>(48.19, 59.31) | 42.76<br>(37.24, 48.27)            | 50.49<br>(44.92, 56.06) |
| <b>Adjusted OR (95% CI)</b>                              | 1.12<br>(0.62, 2.03)    | 1.06<br>(0.62, 1.83)    | <b>2.03</b><br><b>(1.11, 3.72)</b> | 1.53<br>(0.87, 2.68)    |
| <b>p-value</b>                                           | 0.704                   | 0.827                   | <b>0.021</b>                       | 0.138                   |

Trial populations adjusted for: age, sex, BSA≥3%, HAQ-DI, MTX, SJC, TJC. ACR, American College of Rheumatology; ACR20/50/70, at least a 20/50/70% improvement according to the ACR response criteria; bDMARD, biologic disease modifying anti-rheumatic drug; BKZ, bimekizumab; BSA, body surface area; CI, confidence interval; ESS, effective sample size; HAQ-DI, Health Assessment Questionnaire Disability Index; MDA, minimal disease activity; MTX, methotrexate; OR, odds ratio; Q4W, every 4 weeks; SEC, secukinumab; SJC, swollen joint count; TJC, tender joint count.

**Table S2. Base case analysis – Unadjusted and adjusted response rates for bimekizumab (BE COMPLETE) vs secukinumab (FUTURE 2) at Week 52 (TNFi-IR patient subgroup)**

| <b>BKZ 160 mg Q4W</b>                                    | <b>ACR20</b>                       | <b>ACR50</b>                       | <b>ACR70</b>                       | <b>MDA</b>                         |
|----------------------------------------------------------|------------------------------------|------------------------------------|------------------------------------|------------------------------------|
| <b>vs. SEC 150 mg Q4W</b>                                |                                    |                                    |                                    |                                    |
| <b>SEC response rate – % (95% CI) (N=37)</b>             | 37.84<br>(21.67, 54.01)            | 21.62<br>(7.90, 35.35)             | 13.51<br>(2.12, 24.91)             | 16.22<br>(3.93, 28.51)             |
| <b>BKZ unadjusted response rate - % (95% CI) (N=267)</b> | 68.16<br>(62.55, 73.78)            | 51.69<br>(45.66, 57.71)            | 35.58<br>(29.81, 41.35)            | 47.19<br>(41.18, 53.21)            |
| <b>Unadjusted OR (95% CI)</b>                            | 3.52<br>(1.72, 7.21)               | 3.88<br>(1.70, 8.84)               | 3.53<br>(1.32, 9.44)               | 4.62<br>(1.85, 11.50)              |
| <b>BKZ ESS</b>                                           | 145.50                             | 145.50                             | 145.50                             | 145.50                             |
| <b>BKZ adjusted response rate - % (95% CI)</b>           | 68.07<br>(61.53, 74.60)            | 47.82<br>(40.82, 54.82)            | 31.58<br>(25.06, 38.09)            | 40.54<br>(33.66, 47.43)            |
| <b>Adjusted OR (95% CI)</b>                              | <b>3.50</b><br><b>(1.64, 7.49)</b> | <b>3.32</b><br><b>(1.41, 7.80)</b> | <b>2.95</b><br><b>(1.08, 8.07)</b> | <b>3.52</b><br><b>(1.38, 8.99)</b> |
| <b>p-value</b>                                           | <b>0.001</b>                       | <b>0.006</b>                       | <b>0.035</b>                       | <b>0.009</b>                       |
| <b>vs. SEC 300 mg Q4W</b>                                |                                    |                                    |                                    |                                    |
| <b>SEC response rate – % (95% CI) (N=33)</b>             | 54.55<br>(36.89, 72.20)            | 27.27<br>(11.48, 43.06)            | 18.18<br>(4.51, 31.86)             | 18.94<br>(5.88, 32.00)             |
| <b>BKZ unadjusted response rate - % (95% CI) (N=267)</b> | 68.16<br>(62.55, 73.78)            | 51.69<br>(45.66, 57.71)            | 35.58<br>(29.81, 41.35)            | 47.19<br>(41.18, 53.21)            |
| <b>Unadjusted OR (95% CI)</b>                            | 1.78<br>(0.85, 3.73)               | 2.85<br>(1.27, 6.40)               | 2.49<br>(0.98, 6.27)               | 3.82<br>(1.61, 9.06)               |
| <b>BKZ ESS</b>                                           | 145.50                             | 145.50                             | 145.50                             | 145.50                             |
| <b>BKZ adjusted response rate – % (95% CI)</b>           | 68.07<br>(61.53, 74.60)            | 47.82<br>(40.82, 54.82)            | 31.58<br>(25.06, 38.09)            | 40.54<br>(33.66, 47.43)            |
| <b>Adjusted OR (95% CI)</b>                              | 1.78<br>(0.82, 3.87)               | <b>2.44</b><br><b>(1.06, 5.65)</b> | 2.08<br>(0.80, 5.37)               | <b>2.92</b><br><b>(1.20, 7.09)</b> |
| <b>p-value</b>                                           | 0.147                              | <b>0.037</b>                       | 0.131                              | <b>0.018</b>                       |

Trial populations adjusted for: age, sex, BSA $\geq$ 3%, HAQ-DI, MTX, SJC, TJC.  
 ACR, American College of Rheumatology; ACR20/50/70, at least a 20/50/70% improvement according to the ACR response criteria; BKZ, bimekizumab; BSA, body surface area; CI, confidence interval; ESS, effective sample size; HAQ-DI, Health Assessment Questionnaire Disability Index; MDA, minimal disease activity; MTX, methotrexate; OR, odds ratio; Q4W, every 4 weeks; SEC, secukinumab; SJC, swollen joint count; TJC, tender joint count; TNFi-IR, tumour necrosis factor inhibitor-inadequate response or intolerant.

**Table S3. Sensitivity analysis – Unadjusted and adjusted response rates for bimekizumab (BE OPTIMAL) vs secukinumab (pooled FUTURE 2 – 5) at Week 52 (bDMARD-naïve patient subgroup)**

| <b>BKZ 160 mg Q4W</b>                                    | <b>ACR20</b>            | <b>ACR50</b>                 | <b>ACR70</b> | <b>MDA</b> |
|----------------------------------------------------------|-------------------------|------------------------------|--------------|------------|
| <b>vs. SEC 150 mg Q4W</b>                                |                         |                              |              |            |
| <b>SEC response rate – % (95% CI) (N=643)</b>            | 67.96<br>(64.35, 71.58) | 44.63<br>(40.78, 48.48)      | NA           | NA         |
| <b>BKZ unadjusted response rate - % (95% CI) (N=431)</b> | 71.23<br>(66.94, 75.52) | 54.52<br>(49.81, 59.24)      | NA           | NA         |
| <b>Unadjusted OR (95% CI)</b>                            | 1.17<br>(0.89, 1.52)    | 1.49<br>(1.16, 1.90)         | NA           | NA         |
| <b>BKZ ESS</b>                                           | 304.81                  | 304.81                       | NA           | NA         |
| <b>BKZ adjusted response rate - % (95% CI)</b>           | 71.31<br>(66.62, 76.00) | 54.13<br>(48.96, 59.29)      | NA           | NA         |
| <b>Adjusted OR (95% CI)</b>                              | 1.17<br>(0.87, 1.59)    | <b>1.46<br/>(1.11, 1.93)</b> | NA           | NA         |
| <b>p-value</b>                                           | 0.305                   | <b>0.007</b>                 | NA           | NA         |
| <b>vs. SEC 300 mg Q4W</b>                                |                         |                              |              |            |
| <b>SEC response rate – % (95% CI) (N=316)</b>            | 69.94<br>(64.86, 75.01) | 48.42<br>(42.89, 53.95)      | NA           | NA         |
| <b>BKZ unadjusted response rate - % (95% CI) (N=431)</b> | 71.23<br>(66.94, 75.52) | 54.52<br>(49.81, 59.24)      | NA           | NA         |
| <b>Unadjusted OR (95% CI)</b>                            | 1.06<br>(0.77, 1.46)    | 1.28<br>(0.95, 1.71)         | NA           | NA         |
| <b>BKZ ESS</b>                                           | 281.93                  | 281.93                       | NA           | NA         |
| <b>BKZ adjusted response rate – % (95% CI)</b>           | 70.29<br>(65.45, 75.14) | 52.83<br>(47.54, 58.12)      | NA           | NA         |
| <b>Adjusted OR (95% CI)</b>                              | 1.02<br>(0.71, 1.45)    | 1.19<br>(0.86, 1.65)         | NA           | NA         |
| <b>p-value</b>                                           | 0.926                   | 0.283                        | NA           | NA         |

Trial populations adjusted for: age, sex, BSA≥3%, HAQ-DI, MTX, SJC, TJC. ACR, American College of Rheumatology; ACR20/50/70, at least a 20/50/70% improvement according to the ACR response criteria; bDMARD, biologic disease modifying anti-rheumatic drug; BKZ, bimekizumab; BSA, body surface area; CI, confidence interval; ESS, effective sample size; HAQ-DI, Health Assessment Questionnaire Disability Index; MDA, minimal disease activity; MTX, methotrexate; NA, not assessed; OR, odds ratio; Q4W, every 4 weeks; SEC, secukinumab; SJC, swollen joint count; TJC, tender joint count.

**Table S4. Sensitivity analysis – Unadjusted and adjusted response rates for bimekizumab (BE COMPLETE) vs secukinumab (pooled FUTURE 2 – 5) at Week 52 (TNFi-IR patient subgroup)**

| <b>BKZ 160 mg Q4W</b>                                    | <b>ACR20</b>                       | <b>ACR50</b>                       | <b>ACR70</b> | <b>MDA</b> |
|----------------------------------------------------------|------------------------------------|------------------------------------|--------------|------------|
| <b>vs. SEC 150 mg Q4W</b>                                |                                    |                                    |              |            |
| <b>SEC response rate – % (95% CI) (N=264)</b>            | 42.80<br>(36.81, 48.80)            | 22.73<br>(17.65, 27.81)            | NA           | NA         |
| <b>BKZ unadjusted response rate - % (95% CI) (N=267)</b> | 68.16<br>(62.55, 73.78)            | 51.69<br>(45.66, 57.71)            | NA           | NA         |
| <b>Unadjusted OR (95% CI)</b>                            | 2.86<br>(2.00, 4.09)               | 3.64<br>(2.50, 5.30)               | NA           | NA         |
| <b>BKZ ESS</b>                                           | 116.71                             | 116.71                             | NA           | NA         |
| <b>BKZ adjusted response rate - % (95% CI)</b>           | 65.34<br>(58.15, 72.53)            | 44.42<br>(36.91, 51.92)            | NA           | NA         |
| <b>Adjusted OR (95% CI)</b>                              | <b>2.52</b><br><b>(1.57, 4.03)</b> | <b>2.72</b><br><b>(1.71, 4.32)</b> | NA           | NA         |
| <b>p-value</b>                                           | <b>&lt;0.001</b>                   | <b>&lt;0.001</b>                   | NA           | NA         |
| <b>vs. SEC 300 mg Q4W</b>                                |                                    |                                    |              |            |
| <b>SEC response rate – % (95% CI) (N=145)</b>            | 53.10<br>(44.91, 61.29)            | 28.28<br>(20.88, 35.67)            | NA           | NA         |
| <b>BKZ unadjusted response rate - % (95% CI) (N=267)</b> | 68.16<br>(62.55, 73.78)            | 51.69<br>(45.66, 57.71)            | NA           | NA         |
| <b>Unadjusted OR (95% CI)</b>                            | 1.89<br>(1.24, 2.87)               | 2.71<br>(1.75, 4.20)               | NA           | NA         |
| <b>BKZ ESS</b>                                           | 141.99                             | 141.99                             | NA           | NA         |
| <b>BKZ adjusted response rate – % (95% CI)</b>           | 65.74<br>(59.05, 72.42)            | 45.99<br>(38.96, 53.01)            | NA           | NA         |
| <b>Adjusted OR (95% CI)</b>                              | <b>1.69</b><br><b>(1.04, 2.76)</b> | <b>2.16</b><br><b>(1.32, 3.53)</b> | NA           | NA         |
| <b>p-value</b>                                           | <b>0.034</b>                       | <b>0.002</b>                       | NA           | NA         |

Trial populations adjusted for: age, sex, BSA≥3%, HAQ-DI, MTX, SJC, TJC.  
 ACR, American College of Rheumatology; ACR20/50/70, at least a 20/50/70% improvement according to the ACR response criteria; BKZ, bimekizumab; BSA, body surface area; CI, confidence interval; ESS, effective sample size; HAQ-DI, Health Assessment Questionnaire Disability Index; MDA, minimal disease activity; MTX, methotrexate; NA, not assessed; OR, odds ratio; Q4W, every 4 weeks; SEC, secukinumab; SJC, swollen joint count; TJC, tender joint count; TNFi-IR, tumour necrosis factor inhibitor-inadequate response or intolerant.
